# Supplementary material for: Phosphorylation of Golgi Peripheral Membrane Protein Grasp65 Is an Integral Step in the Formation of the Human Cytomegalovirus Cytoplasmic Assembly Compartment
Source: PubMed Central journal article supplement (PMC5050342; doi:10.1128/mbio.01554-16), 2016-10-04
Supplement: mbo005163004sf1.pdf [file mbo005163004sf1.pdf]

284  
285  
286  
287

**Supplemental Material: Rebmann, et.al. Phosphorylation of the Golgi peripheral membrane protein Grasp65 is an integral step in formation of the human cytomegalovirus cytoplasmic assembly compartment.**

Rebmann  
Suppl Fig 1

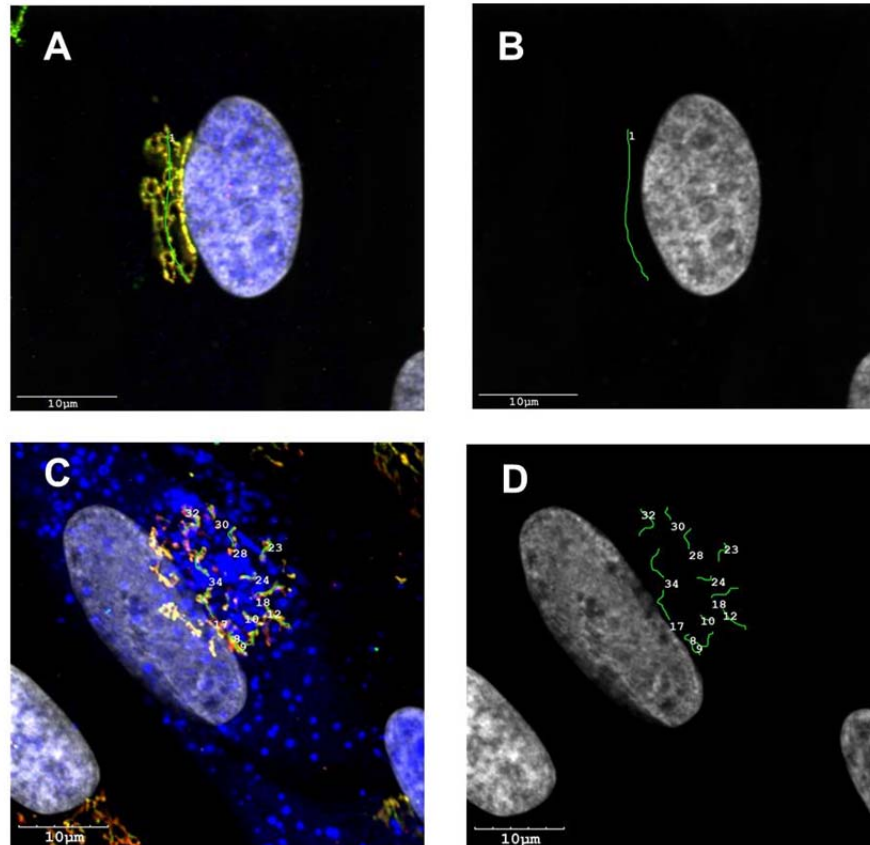

288  
289  
290  
291  
292  
293  
294  
295  
296

**Supplemental Figure 1. Measurement of morphometry of transverse length of Golgi and lengths of Golgi fragments. (A)** Day 1 infected cells stained with anti-pp65 (blue), anti-Grasp65 (red), and anti-GM130 (green). Merged channel yields yellow of overlapping signals. **(B)** Green line demarcates Golgi from Panel A and analytics of software provided quantification of length. **(C)** Fragmented Golgi on day 3 post-infection stained with anti-pp65 (blue), anti-Grasp65 (red), and anti-GM130 (green). Continuous Golgi fragments are numbered. **(D)** Fragment lengths demarcated by green lines and quantification of fragment length determined by software.
